# Supplementary material for: A novel fluorescent sensor for water in organic solvents based on dynamic quenching of carbon quantum dots
Source: Royal Society of Chemistry journal article supplement (doi:10.1039/c8nj04365e), 2018-01-01
Supplement: c8nj04365e1.pdf [file c8nj04365e1.pdf]

A Novel Fluorescent Sensor for Water in Organic Solvents Based on Dynamic Quenching of Carbon Quantum Dots

Jianfei Wei<sup>a,b,†</sup>, Ye Yuan<sup>b,†</sup>, Haikuo Li<sup>b</sup>, Dan Hao<sup>b</sup>, Chenying Sun<sup>b</sup>, Guo Zheng<sup>a,\*</sup>,  
Rui Wang<sup>b,\*</sup>

a. School of Material Science and Engineering, Tianjin Polytechnic University, No. 399 BinShuiXi Road, Xiqing District, Tianjin, P.R. of China

b. School of Material Science and Engineering, Beijing Institute of Fashion Technology, No. A2, East Yinghua Street, Chaoyang District, Beijing, P.R. China,  
E-mail: clywangrui@bift.edu.cn , Tel: 86-10-64288279

† Jianfei Wei and Ye Yuan contribute equally to this work.

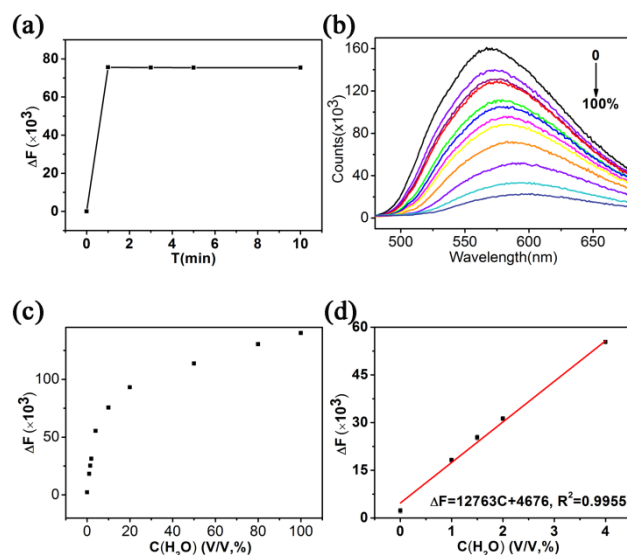

Fig. S1 (a) time-dependent fluorescence quenching of CQDs dispersed in 1,4-Dioxane in the presence of H<sub>2</sub>O (10%,V/V); (b) the fluorescence emission spectra of CQDs dispersed in 1,4-Dioxane with different concentration of H<sub>2</sub>O (0, 2, 4, 6, 8, 10, 20, 50, 80, 100 V/V, %); (c) the change of fluorescence intensity of CQDs solution versus the concentration of H<sub>2</sub>O; (d) a linear relationship between  $\Delta F$  and concentration of H<sub>2</sub>O from 0.001 % to 4 %. Error bars in (c) and (d) represent the standard deviations of five independent measurements

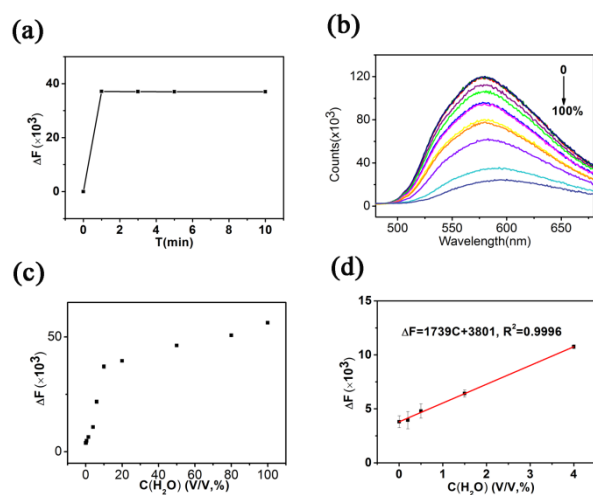

Fig. s2 (a) time-dependent fluorescence quenching of CQDs dispersed in ethanol in the presence of H<sub>2</sub>O (10%,V/V); (b) the fluorescence emission spectra of CQDs dispersed in ethanol with different concentration of H<sub>2</sub>O (0, 2, 4, 6, 8, 10, 20, 50, 80, 100 V/V, %); (c) the change of fluorescence intensity of CQDs solution versus the concentration of H<sub>2</sub>O; (d) a linear relationship between  $\Delta F$  and concentration of H<sub>2</sub>O from 0.001 % to 4 %. Error bars in (c) and (d) represent the standard deviations of five independent measurements.

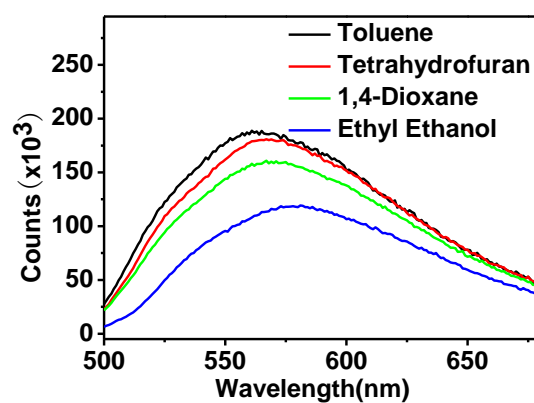

Fig. S3 The fluorescence emission spectra (excited by the light of 440 nm) of CQDs dispersed in different organ solvents (toluene, tetrahydrofuran, 1,4-Dioxane, ethyl ethanol). (The polarity: toluene < tetrahydrofuran < 1,4-Dioxane < ethyl ethanol)
